# Supplementary material for: One-Step Synthesis of Ag@TiO2 Nanoparticles for Enhanced Photocatalytic Performance
Source: PubMed Central journal article supplement (PMC6316728; doi:10.3390/nano8121032), 2018-12-12
Supplement: nanomaterials-08-01032-s001.pdf [file nanomaterials-08-01032-s001.pdf]

# Supplementary Materials

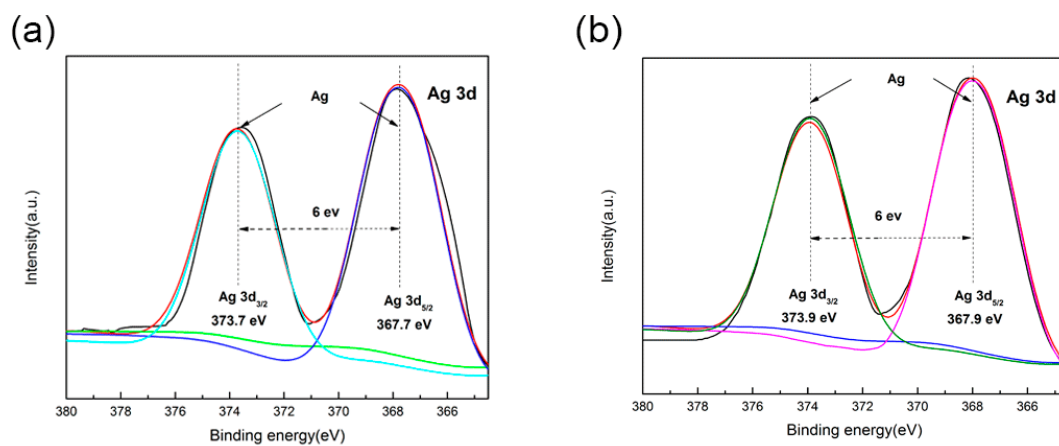

Figure S1. Ag 3d high resolution spectra of Ag@TiO<sub>2</sub> NPs-1 (a) and Ag@TiO<sub>2</sub> NPs-0.25 (b).

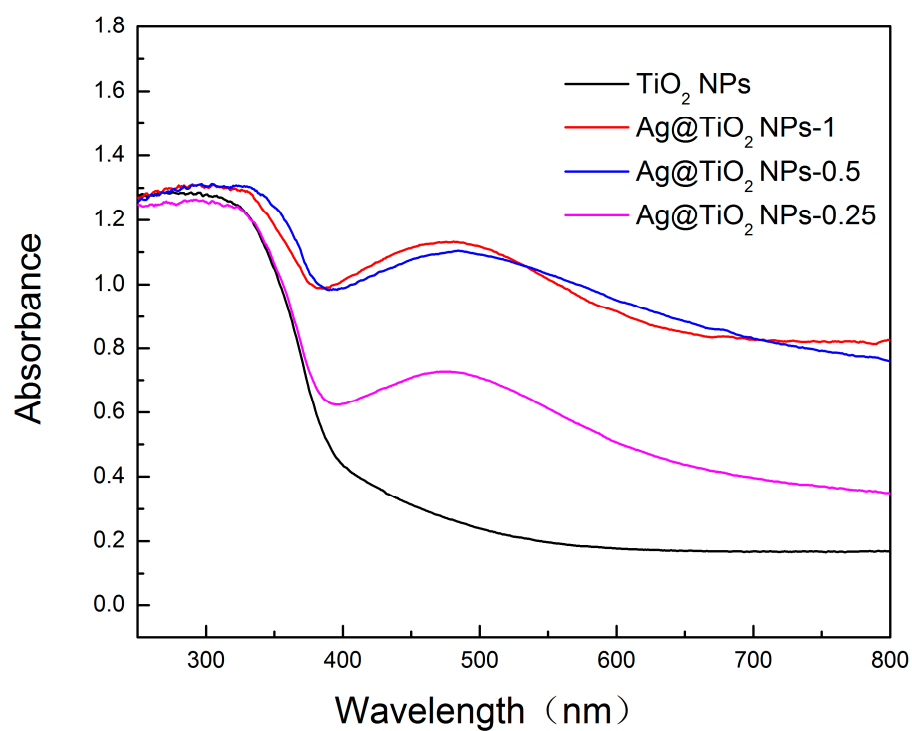

Figure S2. Optical absorption spectroscopy.

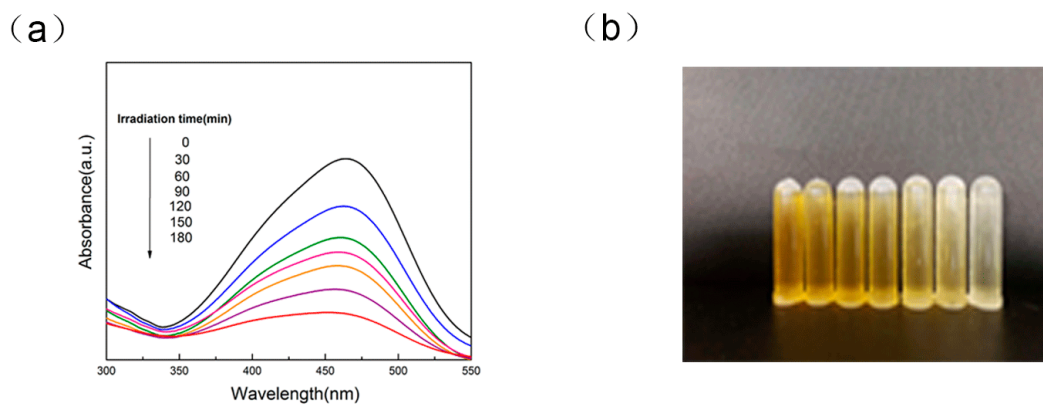

**Figure S3.** UV absorption spectrum during MO degrade process under UV light.

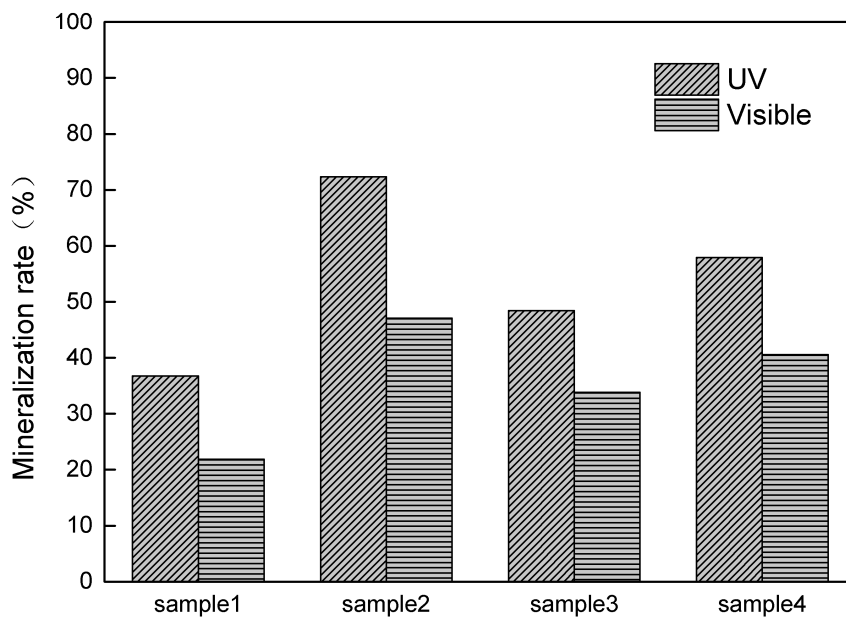

**Figure S4.** Mineralization rates of MO by the samples under UV and Visible light irradiation. Samples 1–4 denote pure TiO<sub>2</sub> NPs, Ag@TiO<sub>2</sub> NPs-0.5, Ag@TiO<sub>2</sub> NPs-0.25 and Ag@TiO<sub>2</sub> NPs-1.
